# Supplementary material for: The Role of the Primary Cilium in Sensing Extracellular pH
Source: MDPI journal article supplement (doi:10.3390/cells8070704), 2019-07-11
Supplement: s1 [file s1]

## **The role of the primary cilium in sensing extracellular pH**

Kimberly F. Atkinson<sup>1,#</sup>, Rinzhin T. Sherpa<sup>1,#</sup>, Surya M. Nauli<sup>1,2,\*</sup>

<sup>1</sup> Department of Biomedical & Pharmaceutical Sciences, Chapman University, Irvine, CA;  
kfisher@chapman.edu (K.F.A); sherp101@mail.chapman.edu (R.T.S)

<sup>2</sup> Department of Medicine, Division of Nephrology, University of California Irvine, Irvine, CA

# These authors contributed equally to the work

\* Correspondence: nauli@chapman.edu; snauli@uci.edu; Tel.: 714-516-5480

### **Supplemental Information:**

- 1. Supplement Movie:** 3D reconstruction of z-stack (0.25  $\mu$ m slices) from NIH3T3 cells highlighting the cilia (green), Gli (red) and nucleus (blue).
- 2. Supplement Figures:** 1-6

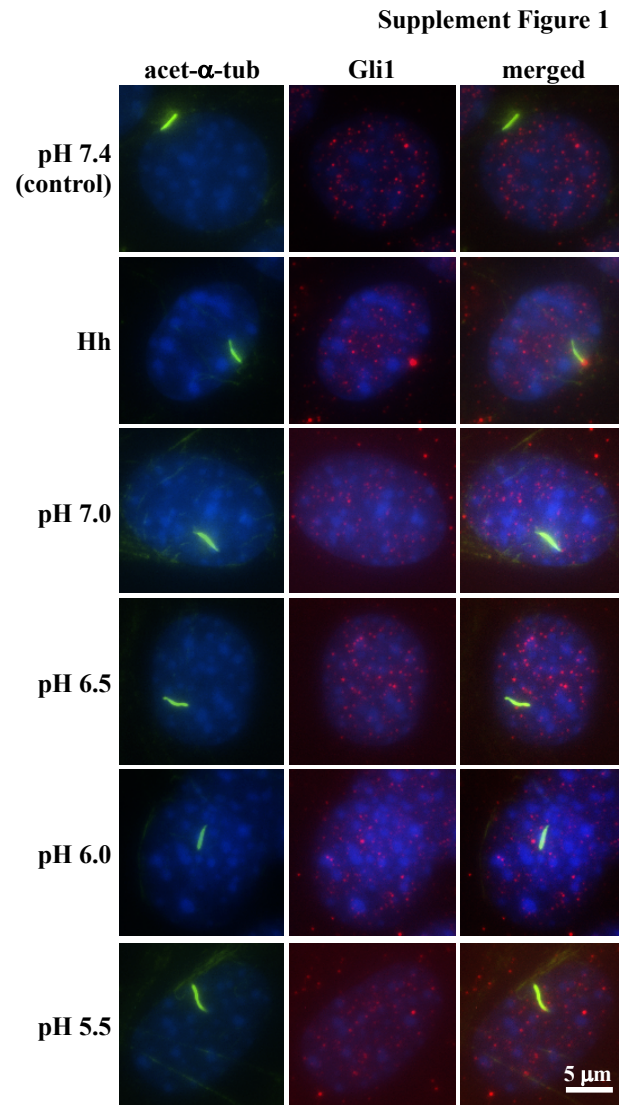

**Supplement Figure 1.** NIH3T3 were stained with ciliary marker (acetylated- $\alpha$ -tubulin; green), Gli (red) and nucleus marker (DAPI; blue). Representative images are shown at different pH<sub>o</sub> or with Hh activation.

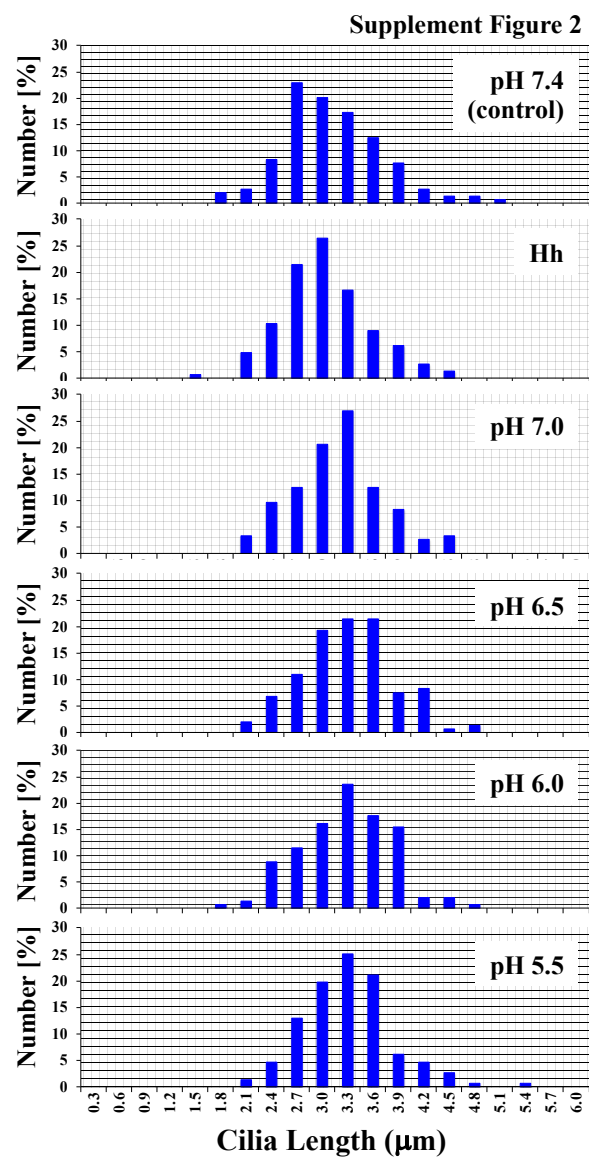

**Supplement Figure 2.** The lengths of primary cilia from 150 NIH3T3 cells were measured from each preparation (N=3; each 50 randomly selected cilia). These measurements are represented in the histogram to show length distribution within control, acidic pH<sub>o</sub> or Hh activation.

Supplement Figure 3

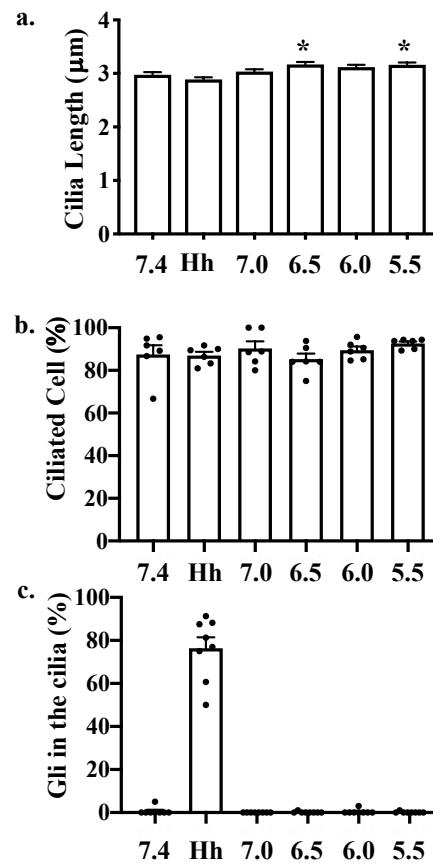

**Supplement Figure 3.** (a) Cilium length of NIH3T3 cells before and after Hh activation or different acidic pH<sub>o</sub> exposures was averaged. (b) The percentage of cells with cilia is shown. (c) The percentage of cells is shown with Gli localization to the cilia. \* indicates significant difference to control pH<sub>o</sub> 7.4.

**Supplement Figure 4**

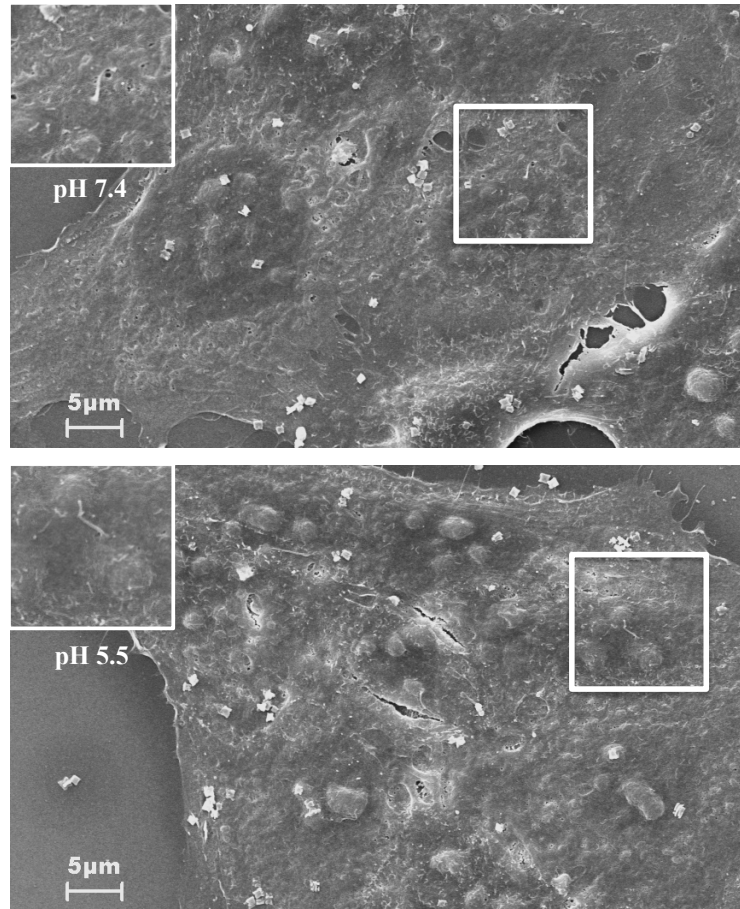

**Supplement Figure 4.** Electron micrographs of endothelial cells at pH 7.4 (top) and pH 5.5 (bottom). White boxes show magnified image of a single cilium.

Supplement Figure 5

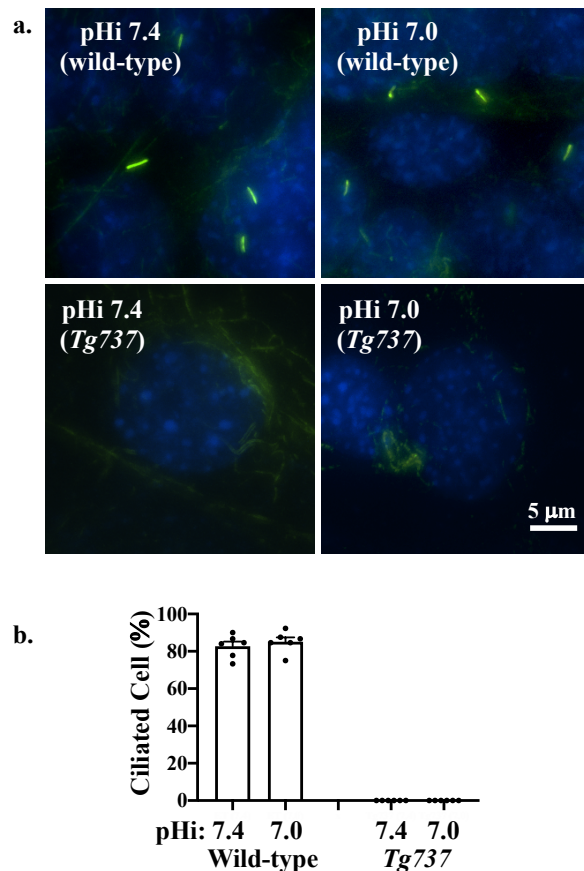

**Supplement Figure 5.** Endothelial cells were stained with ciliary marker (acetylated- $\alpha$ -tubulin; green) and nucleus marker (DAPI; blue). The lengths of primary cilia from 150 endothelial cells were measured from each preparation before and after  $\text{NH}_4\text{Cl}$  pre-pulse in  $0 \text{ Na}^+/\text{K}^+$  solution ( $N=3$ ; each 50 randomly selected cilia). **(a)** Representative images are shown for control ( $\text{pH}_i$  of 7.4) and acidic  $\text{pH}_i$  ( $\text{pH}_i$  of 7.0) in ciliated wild-type and cilia-less *Tg737* cells. **(b)** The percentage of cells with cilia is shown.

Supplement Figure 6

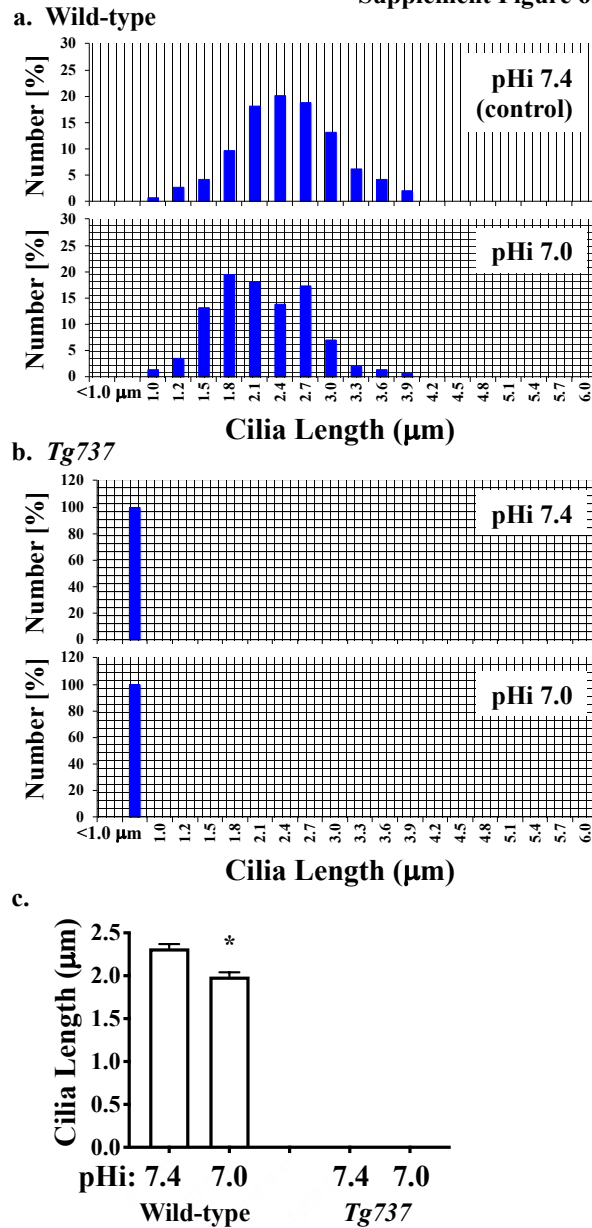

**Supplement Figure 6.** The lengths of primary cilia from 150 endothelial cells were measured from each preparation before and after  $\text{NH}_4\text{Cl}$  pre-pulse in  $0 \text{ Na}^+/\text{K}^+$  solution ( $N=3$ ; each 50 randomly selected cilia). These measurements are represented in the histogram to show length distribution within control ( $\text{pH}_i$  of 7.4) and acidic  $\text{pH}_i$  ( $\text{pH}_i$  of 7.0) in ciliated wild-type (**a**) and cilia-less *Tg737* (**b**) cells. (**c**) Cilium lengths before and after acidic  $\text{pH}_i$  were averaged. \* indicates significant difference to control  $\text{pH}_o$  7.4.
